# Supplementary material for: Single-Cell Analysis Identify Transcription Factor BACH1 as a Master Regulator Gene in Vascular Cells During Aging
Source: Front Cell Dev Biol. 2021 Dec 24;9:786496. doi: 10.3389/fcell.2021.786496 (PMC8740196; doi:10.3389/fcell.2021.786496)
Supplement: Supplementary file 1 [file Table1.XLSX]

## Sheet: Supplementary Table 1.1
Supplementary Table 1.1	The Sequences of siRNA
H-Bach1siRNA-799	CCGCAGGUAUCAAGGAAAUTT
H-Bach1siRNA-1332	GUCAGGAUUUACCUUUGAATT
H-Bach1siRNA-1583	CCAGGUCAAAGGACUUUCATT
ConsiRNA	UUCUCCGAACGUGUCACGUTT

## Sheet: Supplementary Table 1.2
Supplementary Table 1.2	Primers used for qRT-PCR and ChIP
Primer	Sequence (5′-3′)
actin-F (huamn)	GGACCTGACTGACTACCTCAT
actin-R (huamn)	CGTAGCACAGCTTCTCCTTAAT
BACH1-F (human)	CACAATTCTTCCATAGACCCTC
BACH1-R (human)	TCTGCCACTTCTCGCTC
RAP1-F (huamn)	TCAATCCTCCGAGCTACATTCT
RAP1-R (huamn)	GCGTCTGGTCAGAGAGCTG
TIN2-F (human)	ACGCCTTTGTATGGGCCTAAA
TIN2-R (human)	AAGTTTCCTGTGCCTCCAAAAT
TRF1-F (human)	TGCCGACCCTACTGAGGAG
TRF1-R (human)	GCAGAGGAAATCGAGCATCCA
CDKN1A-F (human)	CGATGGAACTTCGACTTTGTCA
CDKN1A-R (human)	GCACAAGGGTACAAGACAGTG
MCP-1-F (human)	CAGCCAGATGCAATCAATGCC
MCP-1-R (human)	TGGAATCCTGAACCCACTTCT
ICAM1-F (huamn)	TTGGGCATAGAGACCCCGTT
ICAM1-R (huamn)	CGTTCCTTGGAAGATCTGTGAT
IL-6-F (human)	CATCCTCGACGGCATCTCAG
IL-6-R (human)	CACCAGGCAAGTCTCCTCAT
ChIP-NC-F	GCGTGGATCATACAACTTCGG
ChIP-NC-R	AGATGAGGAAAACACACTACGGA
ChIP-CDKN1A-F	ACTACTCCCTCCAGCGGTC
ChIP-CDKN1A-R	GCATAGGGGTTGATCTCGGA
